# Supplementary material for: Attenuating endothelial leakiness with self-assembled DNA nanostructures for pulmonary arterial hypertension
Source: Royal Society of Chemistry journal article supplement (doi:10.1039/d2nh00348a), 2022-12-15
Supplement: d2nh00348a5.pdf [file d2nh00348a5.pdf]

## Supporting Information

### Attenuating endothelial leakiness with self-assembled DNA nanostructures for pulmonary arterial hypertension

Qian Liu,<sup>‡ab</sup> Di Wu,<sup>‡a</sup> Bin Feng He,<sup>a</sup> Xiaotong Ding,<sup>a</sup> Yu Xu,<sup>a</sup> Ying Wang,<sup>c</sup> Mingzhou

Zhang,<sup>a</sup> Hang Qian,<sup>\*a</sup> David Tai Leong,<sup>\*d</sup> Guansong Wang,<sup>\*a</sup>

<sup>a</sup> Institute of Respiratory Diseases, Xinqiao Hospital, Third Military Medical University, Chongqing 400037, China.

<sup>b</sup> Laboratory of Pharmacy and Chemistry, and Laboratory of Tissue and Cell Biology, Lab Teaching & Management Center, Chongqing Medical University, Chongqing 400016, China.

<sup>c</sup> Department of Cardiology, Xinqiao Hospital, Third Military Medical University, Chongqing 400037, China.

<sup>d</sup> Department of Chemical and Biomolecular Engineering, National University of Singapore, Singapore 117585, Singapore.

<sup>‡</sup>These authors contributed equally to this work.

\* Corresponding authors.

*E-mail addresses:* hqian@tmmu.edu.cn (H. Qian), cheltwd@nus.edu.sg (D. T. Leong), wanggs@tmmu.edu.cn (G. Wang)

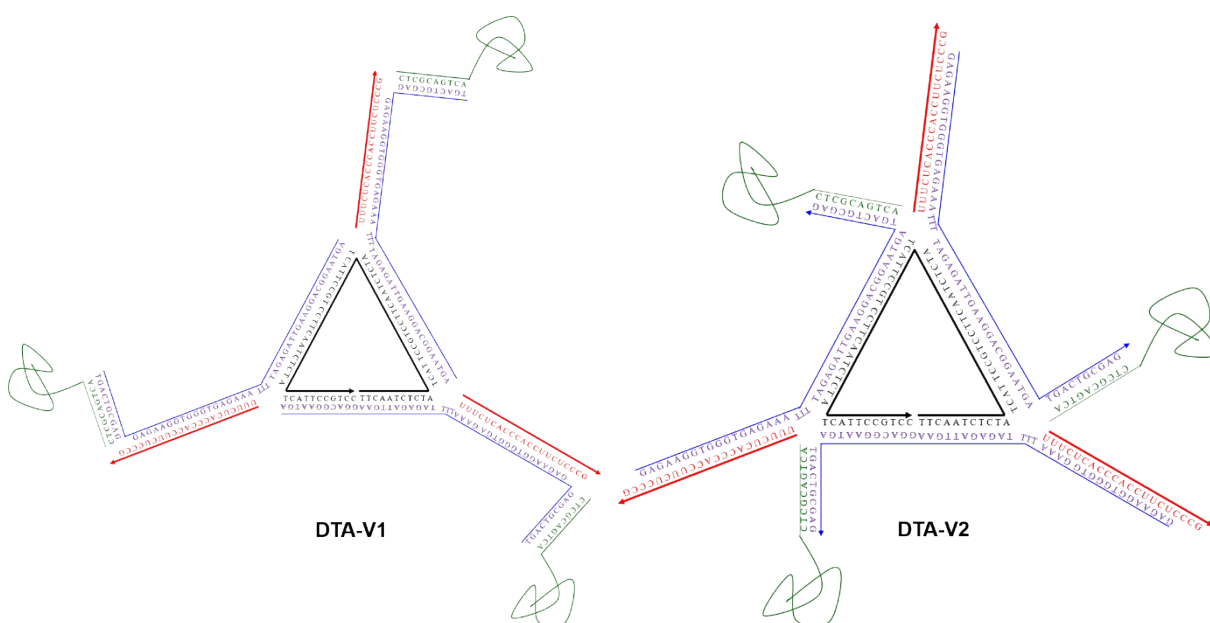

**Figure S1.** Base pairing design of DTA-V1 and DTA-V2.

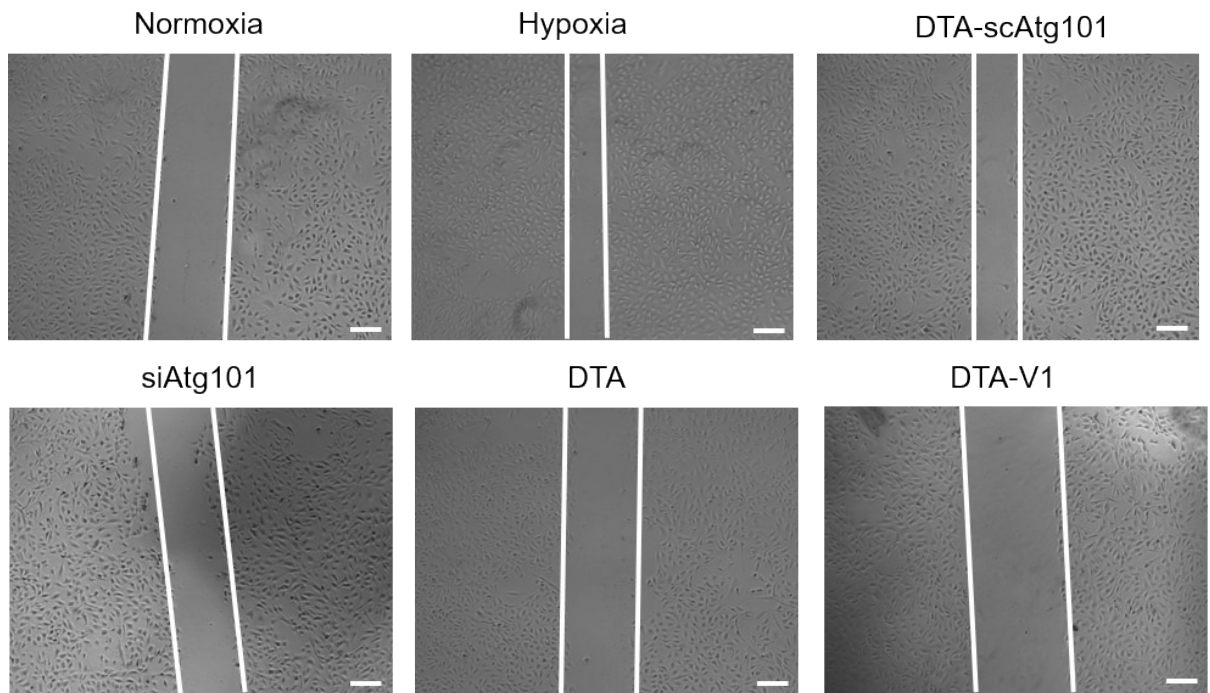

Scale bar: 100  $\mu$ m

**Figure S2.** Scratch assay showed that DTA-V1 effectively inhibited the proliferation of HPAECs. Cells were treated with DTA-V1 for 24 h. siAtg101 concentrations was 600 nM.

Atg101

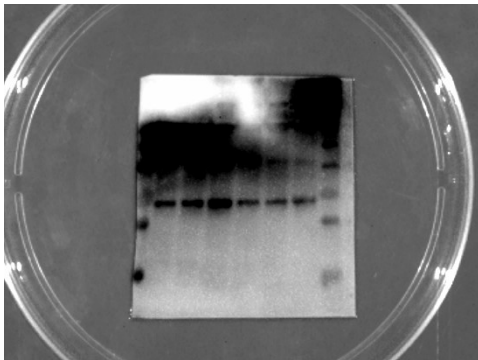

LC3

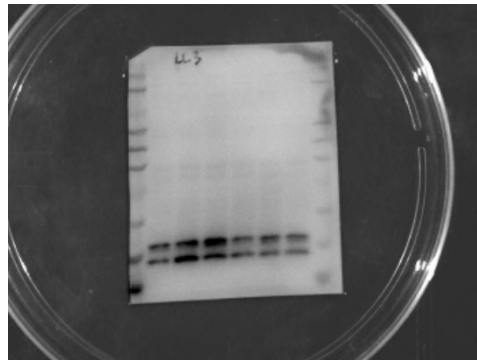

Beclin-1

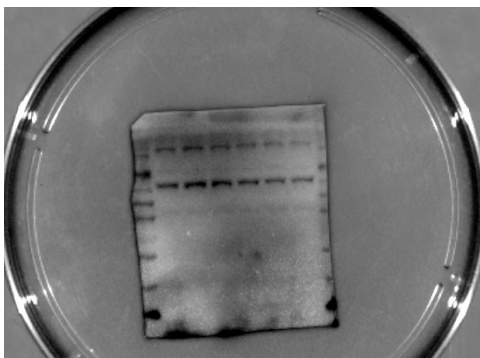

VE-Cadherin

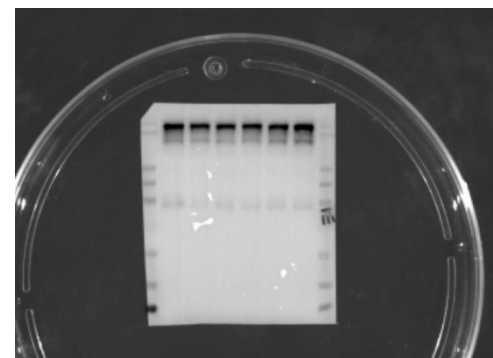

$\beta$ -actin

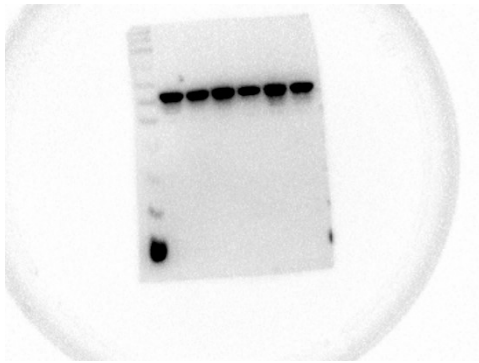

**Figure S3.** Uncropped data for the western blots in Fig. 4B.

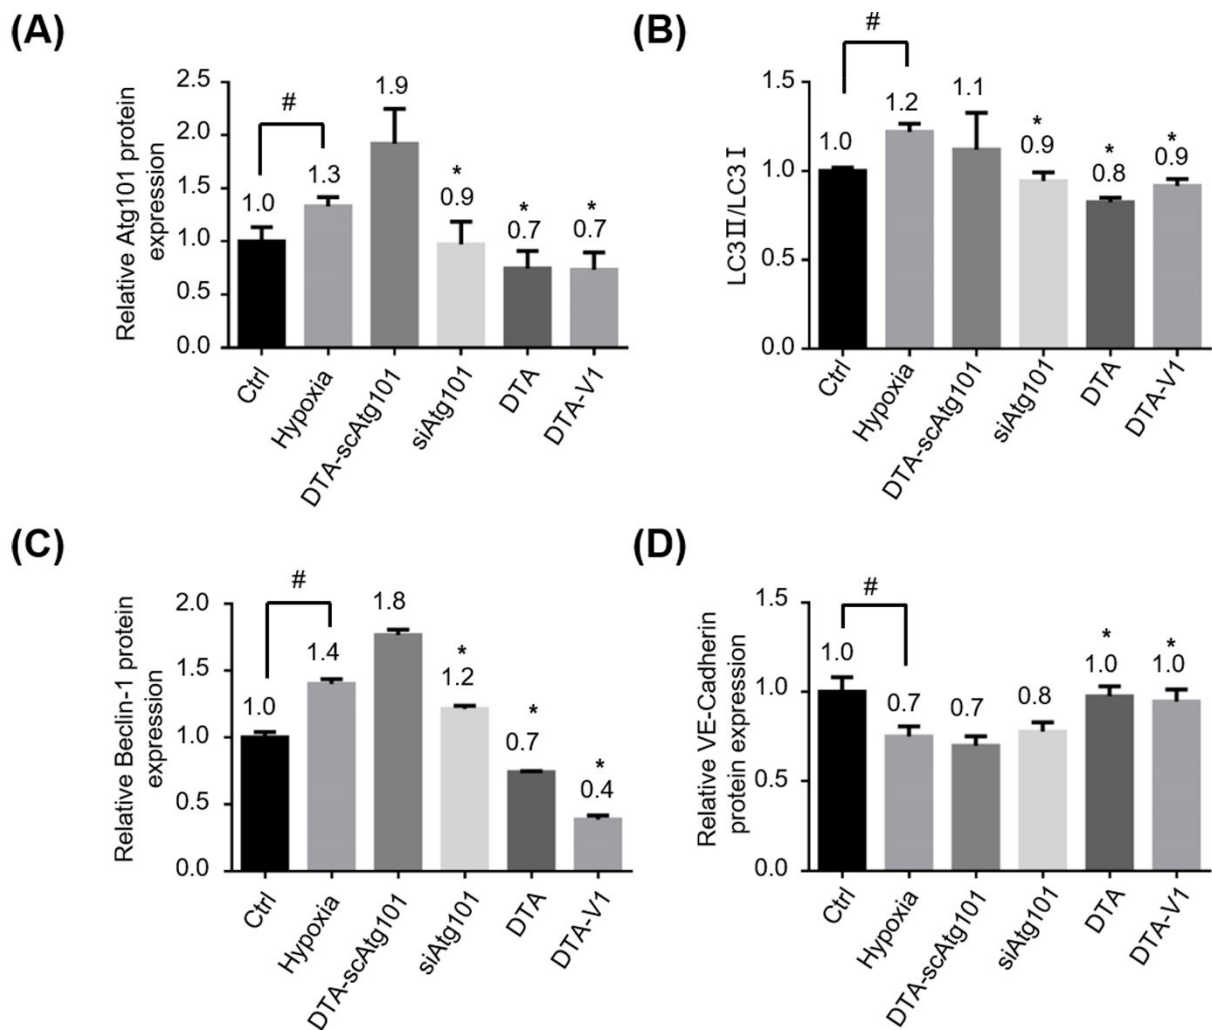

**Figure S4.** Semi-quantitative analysis of the protein expressions in Figure 5B. (A) Atg101; (B) LC3; (C) Beclin-1; (D) VE-Cadherin. All the data of figures represent the mean value  $\pm$  SD (n = 3). p-values were calculated using one-way ANOVA, \*p < 0.05 compared with hypoxia group, #p < 0.05 indicate connected groups.
